# Supplementary material
Source: HighWire-hosted journal article supplement (http://srh.bmj.com/highwire/filestream/138383/field_highwire_adjunct_files/0/jfprhc-2014-100917supp.pdf)

Supplementary Figure 1 The CONSORT flowchart of study participants

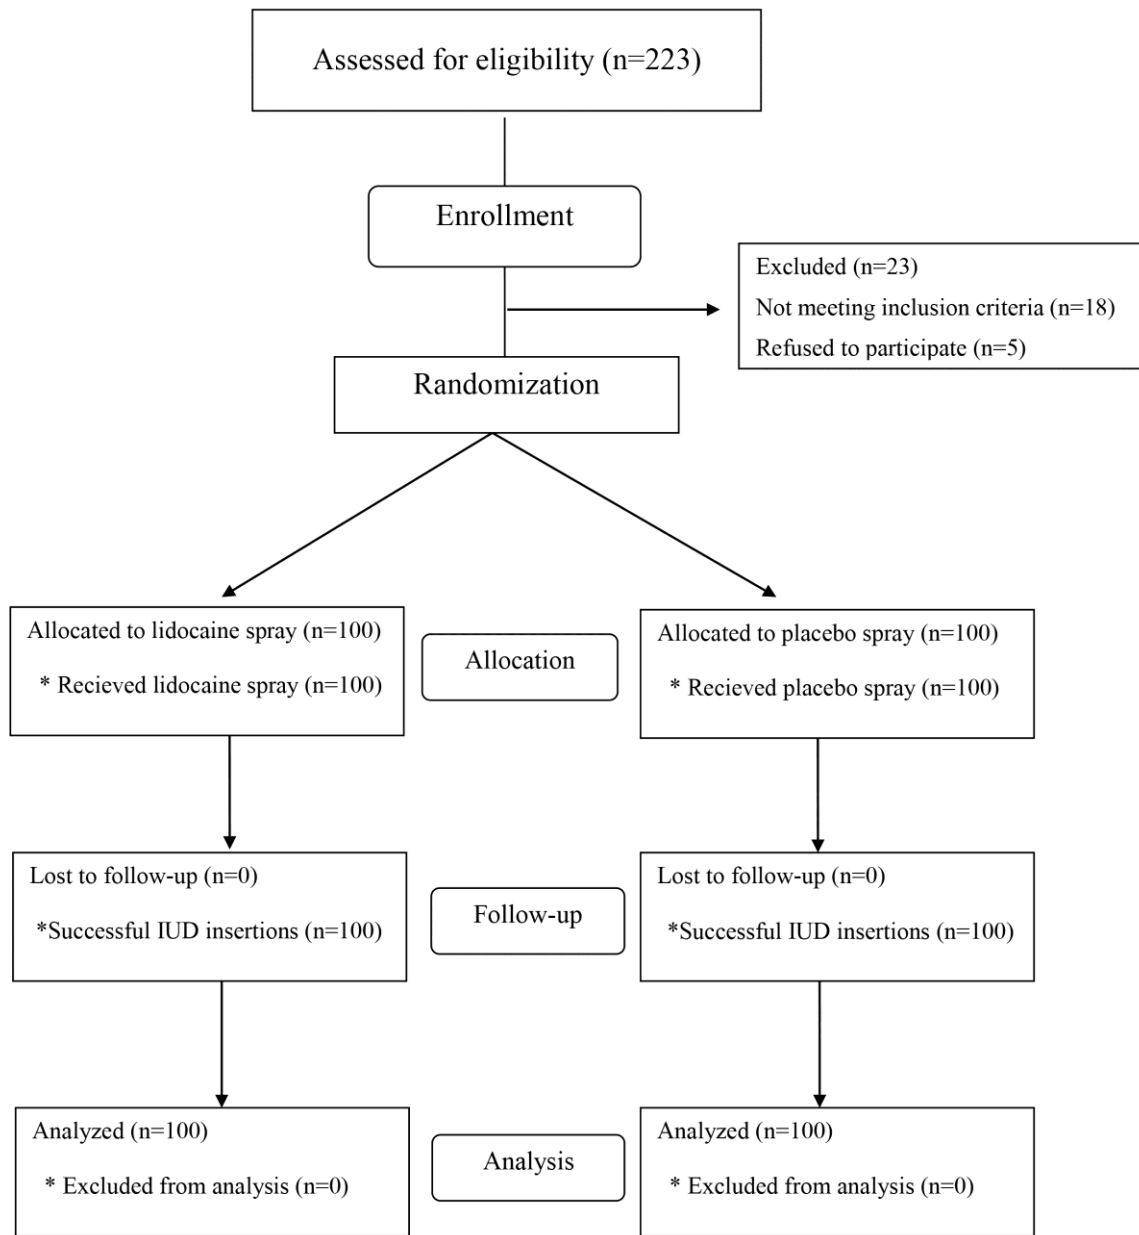

Supplement: jfprhc-2014-100917supp.pdf [file jfprhc-2014-100917supp.pdf]
